# Supplementary material
Source: PubMed Central journal article supplement (PMC3490594)
Supplement: supp_pp.112.199935_199935suppdata.pdf [file supp_pp.112.199935_199935suppdata.pdf]

## **Supplemental Data**

### **Acclimation of Leaf Nitrogen to Vertical Light Gradient at Anthesis in *Triticum aestivum* is a Whole Plant Process that Scales with the Size of Canopy**

Delphine Moreau, Vincent Allard, Oorbessy Gaju, Jacques Le Gouis, John Foulkes, Pierre Martre

INRA, UMR 1095 Genetics, Diversity and Ecophysiology of Cereals, 5 Chemin de Beaulieu, F-63 039 Clermont-Ferrand, France (D.M., V.A., J.L.G., P.M.); Blaise Pascal University, UMR 1095 Genetics, Diversity and Ecophysiology of Cereals, F-63 177 Clermont-Ferrand, France (D.M., V.A., J.L.G., P.M.); Division of Plant and Crop Sciences, School of Biosciences, University of Nottingham, Leicestershire, LE12 5RD, UK (O.G., M.J.F.)

**Table S1** Name, country of origin, registration year, height, and anthesis date for the 16 cultivars of winter bread wheat used in this study. Crops were grown in the field at Clermont-Ferrand, France, during the 2006-2007 (CF07) and 2007-2008 (CF08) growing seasons and at Sutton Bonington, UK, during the 2006-2007 growing season (SB07). For crop height data are means  $\pm$  1 s.e. for  $n = 2$  N treatments  $\times$  3 independent replicates. *P*-values of the main effects and their interactions from split-plot ANOVAs are reported for plant plant height. bl, unregistered INRA breeding lines

| Cultivar name                     | Country of Origine | Registration year | Height (cm)    |                |                | Anthesis date (day of the year) <sup>a</sup> |           |          |
|-----------------------------------|--------------------|-------------------|----------------|----------------|----------------|----------------------------------------------|-----------|----------|
|                                   |                    |                   | CF07           | CF08           | SB07           | CF07                                         | CF08      | SB07     |
| Alchemy                           | UK                 | 2006              | 61.8 $\pm$ 3.8 | 70.7 $\pm$ 4.6 | -              | 141 (+6)                                     | 151 (+2)  | -        |
| Beaver                            | UK                 | 1990              | 53.9 $\pm$ 4.0 | 69.2 $\pm$ 5.6 | -              | 141 (+6)                                     | 153 (+4)  | -        |
| Consort                           | UK                 | 1995              | 58.9 $\pm$ 3.9 | 69.0 $\pm$ 6.2 | -              | 141 (+6)                                     | 152 (+3)  | -        |
| Paragon                           | UK                 | 1995              | 81.2 $\pm$ 4.9 | 99.9 $\pm$ 7.1 | -              | 137 (+2)                                     | 151 (+2)  | -        |
| Rialto                            | UK                 | 1995              | 63.6 $\pm$ 5.1 | 75.3 $\pm$ 4.7 | 80.7 $\pm$ 3.8 | 135                                          | 149       | 155      |
| Robigus                           | UK                 | 2003              | 57.0 $\pm$ 4.5 | 72.0 $\pm$ 5.7 | -              | 137 (+2)                                     | 151 (+2)  | -        |
| Savannah                          | UK                 | 1998              | 61.6 $\pm$ 5.5 | 71.8 $\pm$ 5.8 | 85.9 $\pm$ 2.2 | 140 (+5)                                     | 151 (+2)  | 155 (0)  |
| Soissons                          | France             | 1988              | 63.9 $\pm$ 4.7 | 68.9 $\pm$ 2.7 | -              | 128 (-7)                                     | 137 (-12) | -        |
| Arche                             | France             | 1989              | 68.8 $\pm$ 5.3 | 81.2 $\pm$ 4.9 | -              | 133 (-2)                                     | 144 (-5)  | -        |
| CF9107                            | France             | bl                | 62.7 $\pm$ 5.1 | 67.2 $\pm$ 4.7 | -              | 129 (-6)                                     | 143 (-6)  | -        |
| CF99102                           | France             | bl                | 69.2 $\pm$ 4.2 | 78.9 $\pm$ 5.7 | 98.0 $\pm$ 2.7 | 133 (-2)                                     | 144 (-5)  | 154 (-1) |
| Perfector                         | France             | 2004              | 60.2 $\pm$ 4.3 | 70.9 $\pm$ 4.6 | 82.1 $\pm$ 2.9 | 134 (-1)                                     | 150 (+1)  | 154 (-1) |
| Quebon                            | France             | 2004              | 68.3 $\pm$ 4.9 | 83.1 $\pm$ 5.0 | -              | 134 (-1)                                     | 149 (0)   | -        |
| Récital                           | France             | 1986              | 62.2 $\pm$ 5.4 | 71.8 $\pm$ 4.6 | -              | 123 (-12)                                    | 136 (-13) | -        |
| Renan                             | France             | 1989              | 64.3 $\pm$ 5.0 | 74.4 $\pm$ 5.2 | -              | 130 (-5)                                     | 142 (-7)  | -        |
| Toisonдор                         | France             | 2004              | 51.8 $\pm$ 5.4 | 63.3 $\pm$ 4.5 | -              | 129 (-6)                                     | 144 (-5)  | -        |
| Min                               |                    |                   | 51.8           | 63.3           | 80.7           | 123                                          | 136       | 154      |
| Max                               |                    |                   | 81.2           | 99.9           | 98.0           | 141                                          | 153       | 155      |
| Average                           |                    |                   | 63.1           | 74.2           | 86.7           | 134                                          | 147       | 154      |
| <i>P</i> -values                  |                    |                   |                |                |                |                                              |           |          |
| N                                 |                    |                   | < 0.0001       |                |                |                                              |           |          |
| Year                              |                    |                   | < 0.0001       |                |                |                                              |           |          |
| Genotype                          |                    |                   | < 0.0001       |                |                |                                              |           |          |
| N $\times$ Year                   |                    |                   | 0.1841         |                |                |                                              |           |          |
| N $\times$ Genotype               |                    |                   | 0.3664         |                |                |                                              |           |          |
| Year $\times$ Genotype            |                    |                   | < 0.0001       |                |                |                                              |           |          |
| N $\times$ Year $\times$ Genotype |                    |                   | 0.0071         |                |                |                                              |           |          |

<sup>a</sup> numbers in parenthesis are differences in days of anthesis relative to Rialto

**Table S2** Soil characteristics at Clermont-Ferrand, France, during the 2006-2007 (CF07) and 2007-2008 (CF08) growing seasons and at Sutton Bonington, UK, during the 2006-2007 growing season (SB07).

| Soil characteristics                                                         | CF07      | CF08      | SB08         |
|------------------------------------------------------------------------------|-----------|-----------|--------------|
| Previous crop                                                                | sunflower | barley    | oilseed rape |
| Soil textural class (USDA system)                                            | clay      | clay loam | clay loam    |
| Soil particle size distribution (% of soil dry mass)                         |           |           |              |
| Stone (> 2.0 mm)                                                             | < 2%      | < 2%      | < 2%         |
| Sand (0.05-2.0 mm)                                                           | 24.8      | 19.8      | 16.3         |
| Silt (0.002-0.05 mm)                                                         | 45.9      | 36.7      | 56.3         |
| Clay (< 0.002 mm)                                                            | 29.2      | 43.5      | 27.3         |
| Maximum rooting depth (m)                                                    | 0.6       | 0.9       | 1.6          |
| Plant available soil water content (mm)                                      | 129       | 122       | 165          |
| Apparent bulk density (Mg m <sup>-3</sup> )                                  | 1.10      | 1.15      | 1.37         |
| Organic matter (%)                                                           | 2.9       | 3.1       | 3.0          |
| Organic N in the top soil (0-40 cm layer; Mg N m <sup>-2</sup> )             | 9.03      | 10.51     | 9.41         |
| pH in water                                                                  | 8.2       | 8.1       | 7.6          |
| Inorganic soil N (0-90 cm layer) at the end of winter (g N m <sup>-2</sup> ) | 7.4       | 6.2       | 9.6          |

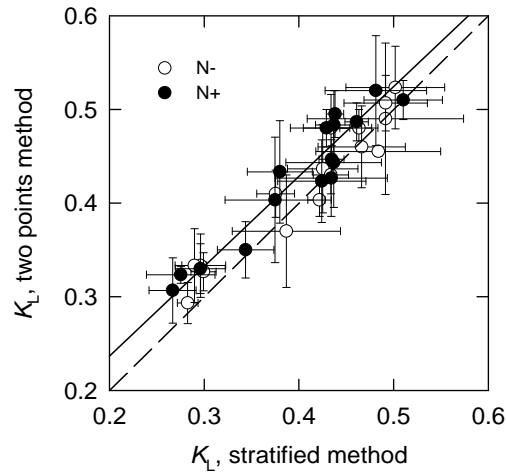

**Fig. S1.** Comparison of the two methods used to estimate the canopy light extinction coefficient ( $K_L$ ) for wheat crops grown at Clermont-Ferrand, France, during the 2006-2007 growing season. Within a N treatment each point represents a different cultivar. In the stratified method,  $K_L$  was estimated from PPF<sub>D</sub> measurements taken every 10 cm from the top of the canopy to the ground level. In the two point method,  $K_L$  was estimated from PPF<sub>D</sub> measurements taken above the canopy and at ground level only. Data are means  $\pm$  1 s.e. for  $n = 3$  independent replicates. Dashed line is  $y = x$ . Solid line is reduced major axis linear regression ( $y = 0.9293 x - 0.0483$ ,  $r^2 = 0.929$ ,  $d.f. = 30$ ,  $P < 0.0001$ ).

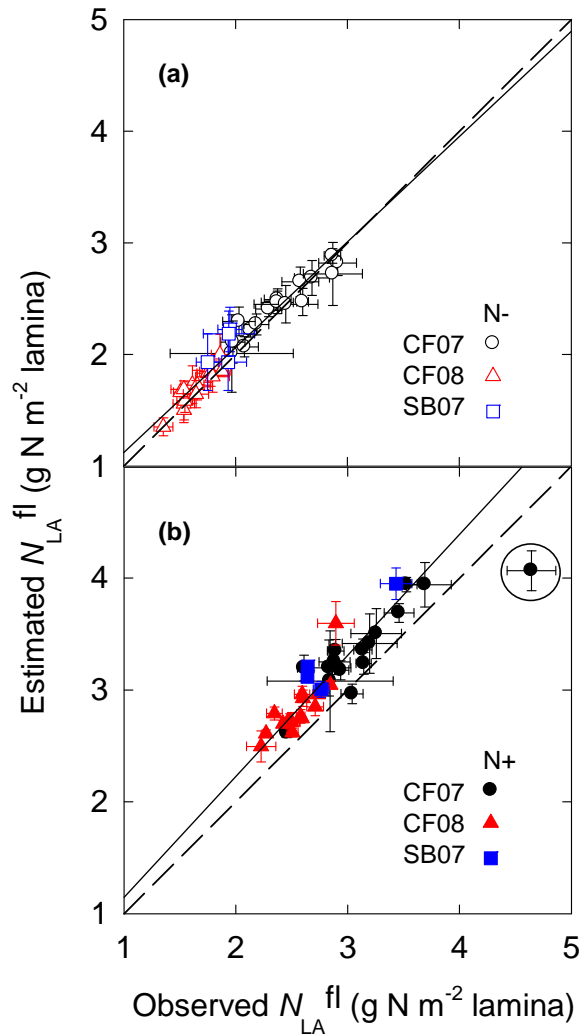

**Fig. S2.** Estimated versus observed flag leaf lamina N mass per unit leaf area ( $N_{LA}^{fl}$ ) at anthesis for 16 cultivars of bread wheat grown under low (A) and high (B) N supply. Data are means  $\pm$  1 s.e. for  $n = 3$  independent replicates. Dashed line is  $y = x$ . Solid line is reduced major axis linear regression (for N-,  $y = 0.944x + 0.176$ ,  $r^2 = 0.951$ ,  $d.f. = 34$ ,  $P < 0.0001$ ; for

N+,  $y = 1.081 x + 0.066$ ,  $r^2 = 0.920$ ,  $d.f. = 33$ ,  $P < 0.0001$ ). For N+, the circled point (Soissons) was not included in the regression.  $N_{LA}^{fl}$  was estimated using Eqn 5.

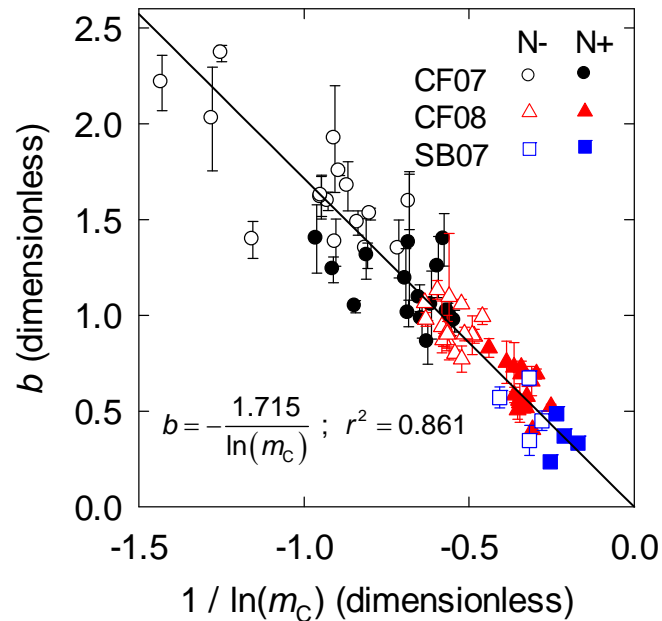

**Fig. S3.** Relationship between the ratio of nitrogen-to-light extinction coefficients ( $b$ ) and the reciprocal of the natural logarithm of the canopy transmittance ( $m_c$ ) at anthesis for 16 cultivars of bread wheat grown under low (N-) and high (N+) at Clermont-Ferrand, France, during the 2006-2007 (CF07) and 2007-2008 (CF08) growing seasons and for four cultivars grown at Sutton Bonington, UK, during the 2006-2007 growing season (SB07). Data are means  $\pm$  1 s.e. for  $n = 3$  independent replicates. Solid line is reduced major axis linear regression.

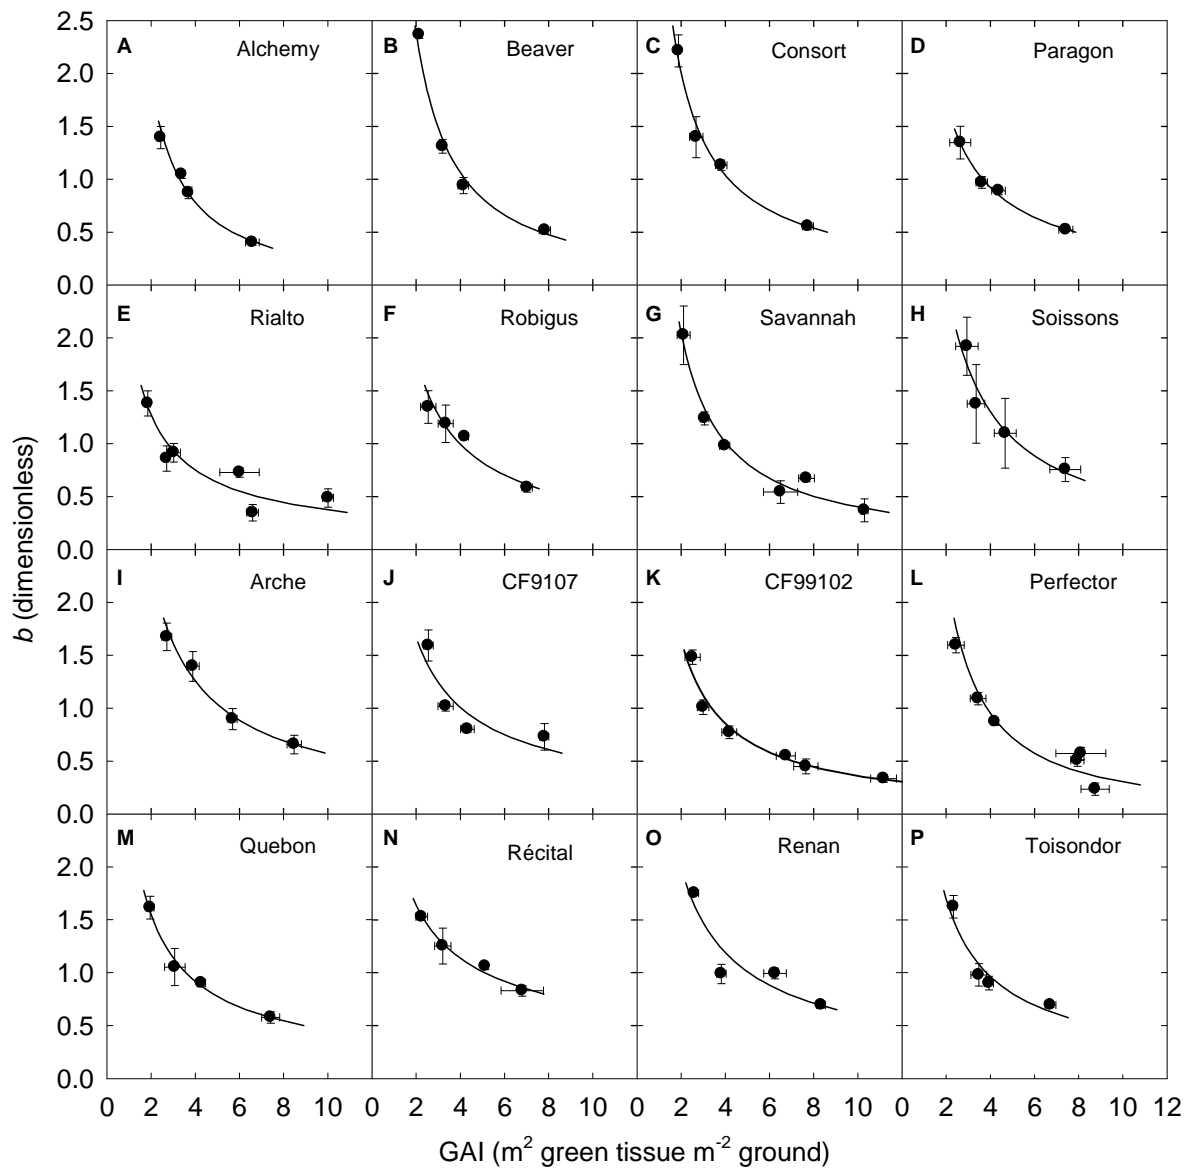

**Fig. S4.** Coefficient of leaf N distribution with respect to relative light ( $b$ ) versus green area index (GAI) at anthesis for 16 cultivars of bread wheat. The name of the cultivar is given in the figures. Solid lines were fitted to the data by reduced major axis regression after logarithmic transformation of the function equation  $b = \beta \times \text{GAI}^\alpha$ . Data are means  $\pm$  1 s.e. for  $n = 3$  independent replicates.

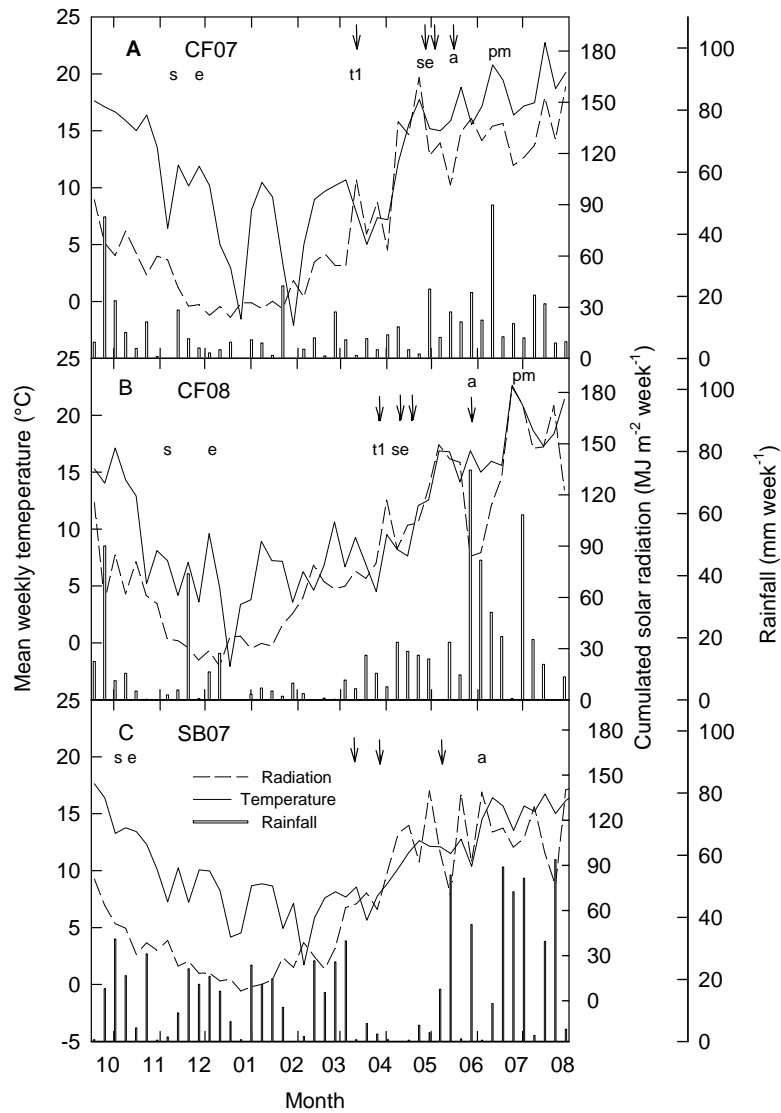

**Fig. S5.** Mean weekly temperature (solid lines), cumulated weekly solar radiation (dashed lines), and cumulated weekly rainfall (vertical bars) at Clermont-Ferrand during the 2006-2007 (A) and 2007-2008 (B) growing seasons and at Sutton Bonington (SB) during the 2006-2007 growing season (C). The letters indicate sowing (s), emergence (e), first tiller (t1), beginning of stem extension (se), anthesis (a), and physiological maturity (pm). The vertical arrows indicate N applications for the N+ treatment.
